# Supplementary material for: Regulation of REM and Non-REM Sleep by Periaqueductal GABAergic Neurons
Source: PubMed Central journal article supplement (PMC5783937; doi:10.1038/s41467-017-02765-w), 2018-01-24
Supplement: 41467_2017_2765_MOESM1_ESM.pdf [file 41467_2017_2765_MOESM1_ESM.pdf]

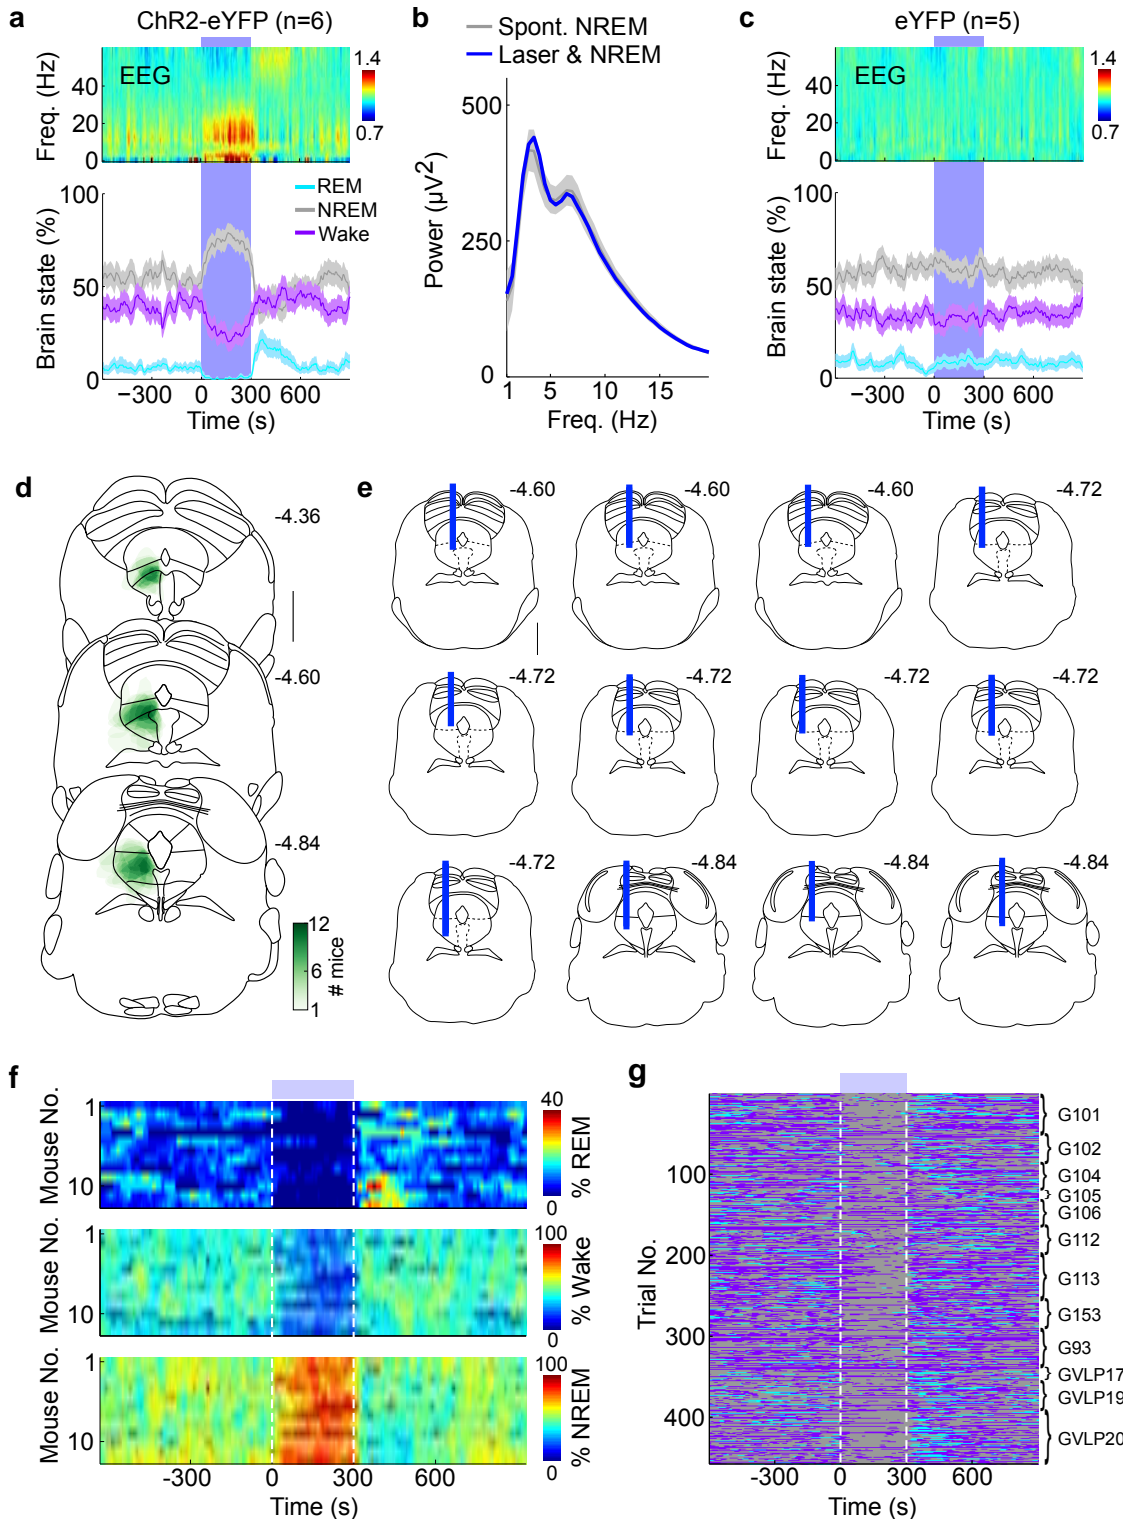

1

2 **Supplementary Figure 1** Effects of laser stimulation in vIPAG of *GAD2-Cre* mice  
 3 expressing ChR2-eYFP or eYFP alone and expression of ChR2 throughout vIPAG. (a)  
 4 Effect of ChR2-mediated activation of GABAergic vIPAG neurons in additional mice ( $n$   
 5 = 6) that were not included in our previous study<sup>1</sup>. Top, average EEG spectrogram  
 6 (normalized by the mean power in each frequency band). Bottom, percentage of REM,

7 NREM or wake states before, during, and after laser stimulation. The changes in REM,  
8 NREM, and wake induced by laser stimulation were highly significant ( $P < 0.0001$ ,  
9 bootstrap). Shading, 95% confidence intervals (CI). Blue stripe, laser stimulation period  
10 (20 Hz, 300 s). **(b)** Comparison of EEG power spectra during spontaneous NREM sleep  
11 outside of laser stimulation periods (grey) and NREM sleep overlapping with laser  
12 stimulation (blue), averaged across all Chr2-eYFP mice ( $n = 12$ ). Gray shading,  $\pm$ s.e.m.  
13 for spontaneous NREM sleep. **(c)** Effect of laser stimulation on brain states in eYFP  
14 control mice ( $n = 5$ ). Laser stimulation did not significantly change the percentage of any  
15 brain state ( $P > 0.33$ , bootstrap). **(d)** Expression of Chr2-eYFP in *GAD2-Cre* mice. For  
16 each mouse ( $n = 12$ ), we determined the spread of Chr2-eYFP in three consecutive brain  
17 sections (from -4.36 mm to -4.84 mm along the rostrocaudal axis, where most of the virus  
18 expression was observed). The green color code indicates in how many mice the virus  
19 expression overlapped at the corresponding location. Scale bar, 1 mm. **(e)** Location of  
20 fiber tracts for optogenetic stimulation experiments. Each coronal section depicts the  
21 location of the optic fiber (blue bar) in each mouse ( $n = 12$ ) used for optogenetic  
22 stimulation of vIPAG GABAergic neurons. Scale bar, 1 mm. **(f)** Percentage of REM  
23 (top), wake (middle), and NREM sleep (bottom) for each single mouse ( $n = 12$ ). Each  
24 row corresponds to a single mouse and color-codes the brain state percentage averaged  
25 across all trials before, during, and after laser stimulation (300 s, 20 Hz). **(g)** All laser  
26 stimulation trials from 12 mice. Each row represents the color-coded brain state before,  
27 during, and after laser stimulation of a single trial. Each bracket on the right indicates all  
28 trials from a single mouse.

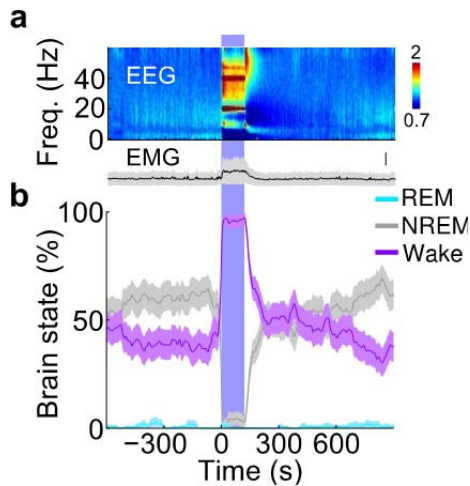

30

31 **Supplementary Figure 2** Optogenetic activation of glutamatergic neurons in the vIPAG  
 32 induces wakefulness. (a) Top, average EEG spectrogram (normalized by the mean power  
 33 in each frequency band), averaged across all *VGLUT2-Cre* mice ( $n = 4$ ). Bottom, average  
 34 EMG amplitude. Scale bar 20  $\mu$ V. Shading,  $\pm$ s.e.m. (b) Bottom, percentage of REM,  
 35 NREM, and wake states before, during, and after laser stimulation. Optogenetic  
 36 activation of the glutamatergic neurons induced a strong increase in wakefulness ( $P <$   
 37 0.0001, bootstrap), while suppressing NREM sleep ( $P < 0.0001$ ). Blue stripe, laser  
 38 stimulation period (20 Hz, 120 s).

39

40

41

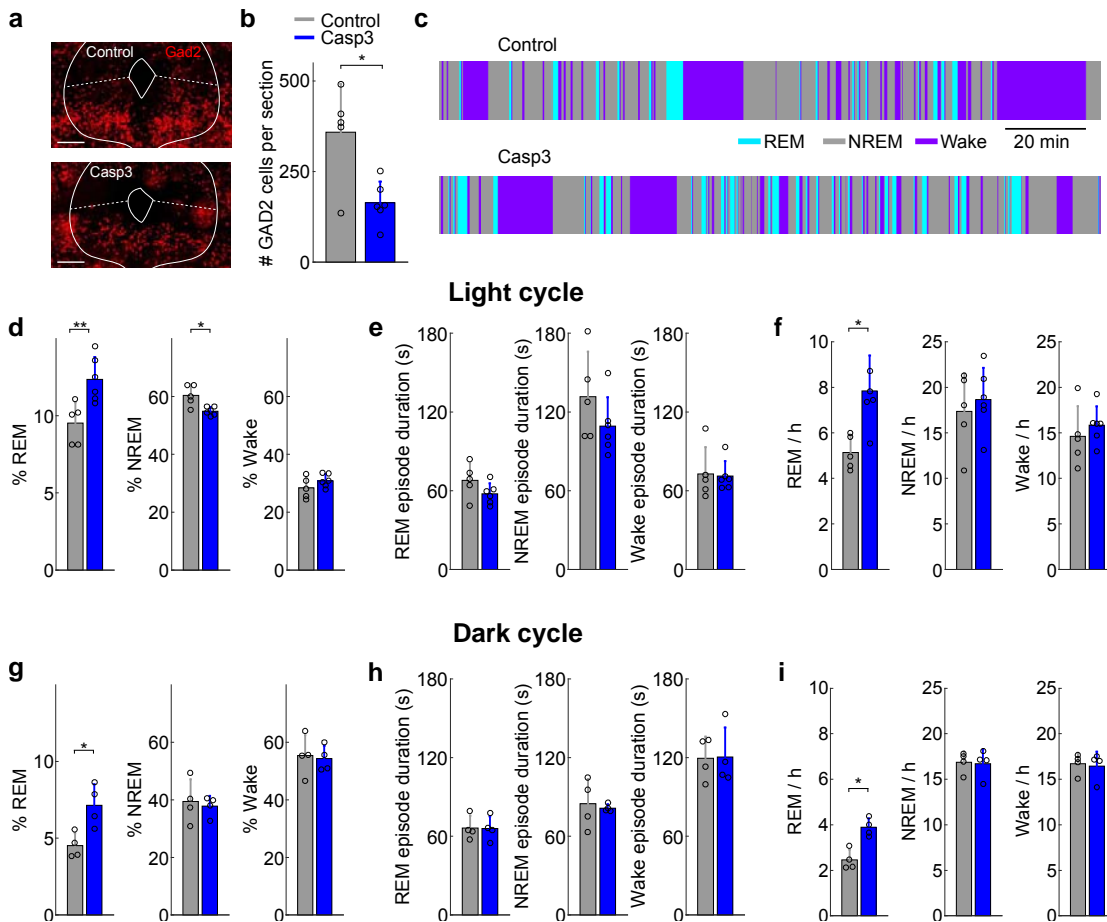

42  
43

44 **Supplementary Figure 3.** Selective ablation of vIPAG GABAergic neurons increases  
 45 REM sleep. **(a)** Top, fluorescence image from a control mouse showing the PAG. Red,  
 46 FISH for mRNA encoding *GAD2* (scale bar, 250  $\mu$ m). Bottom, fluorescence image from  
 47 an experimental animal injected with AAV expressing pro-Caspase 3 (Casp3). Note the  
 48 reduced number of *GAD2* neurons in the vIPAG compared to the control (top). **(b)**  
 49 Number of *GAD2* cells per section (30  $\mu$ m thick) in the vIPAG of control mice ( $n = 5$ )  
 50 and mice expressing Caps3 ( $n = 6$ ). On average, Casp3 expression reduced the number of  
 51 *GAD2* cells by 54.3% ( $P = 0.01$ ,  $T(9) = -3.24$ ;  $t$ -test). Each circle, data from one mouse.  
 52 Error bar,  $\pm$ s.d. **(c)** Top, 3 hr long hypnogram from a control mouse expressing eYFP  
 53 recorded during the light cycle. Bottom, hypnogram recorded from a mouse expressing  
 54 Casp3. **(d-f)** Percentage **(d)**, average duration **(e)**, and frequency **(f)** of REM, NREM, or  
 55 wake states during the light cycle in control mice ( $n = 5$ , gray) and mice expressing  
 56 Casp3 ( $n = 6$ , blue). In mice expressing Casp3, the percentage of REM sleep was  
 57 significantly increased ( $P = 0.009$ ,  $z = 50.0$ ; Wilcoxon rank-sum test), due to an increased  
 58 frequency of REM sleep episodes ( $P = 0.02$ ,  $z = 49.0$ ). In contrast, the amount of NREM  
 59 sleep was significantly reduced ( $P = 0.02$ ,  $z = 23.0$ ). Each circle, data from one mouse.  
 60 \* $P < 0.05$ , \*\* $P < 0.01$ , Wilcoxon rank-sum test. Error bar,  $\pm$ s.d. **(g-i)** Percentage,  
 61 average duration, and frequency of each brain state during the dark cycle in control mice ( $n = 4$ )  
 62 and mice expressing Casp3 ( $n = 4$ ). During the dark cycle, the percentage of REM sleep  
 63 in mice expressing Casp3 was significantly increased ( $P = 0.03$ ,  $z = 26.0$ ), due to an  
 64 increased frequency of REM sleep episodes ( $P = 0.03$ ,  $z = 26.0$ ).

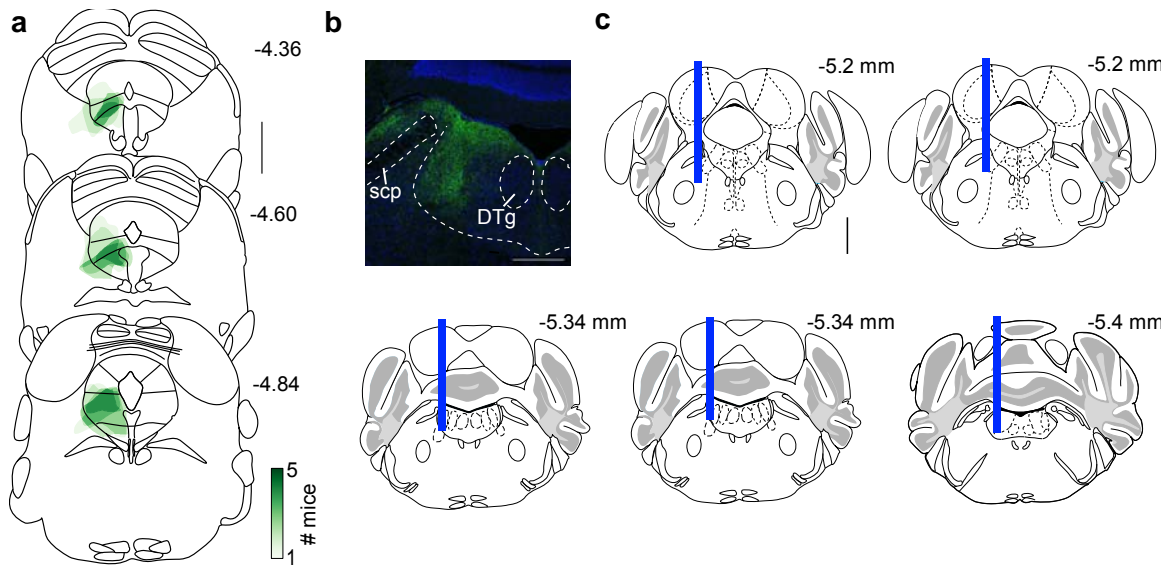

65  
 66  
 67  
 68  
 69  
 70  
 71  
 72  
 73  
 74  
 75  
 76  
 77  
 78

**Supplementary Figure 4.** Virus expression and optic fiber placement in axon fiber activation experiments. **(a)** Expression of ChR2-eYFP in *GAD2-Cre* mice at the injection site in vIPAG ( $n = 5$ ). The virus expression was determined in three consecutive coronal sections. The color code indicates the number of mice, in which the virus expression overlapped at the corresponding location. Scale bar, 1 mm. **(b)** Expression of eYFP in the dorsolateral pons following AAV-eYFP injection into the vIPAG of a *GAD2-Cre* mouse. DTg, dorsal tegmental nucleus; scp, superior cerebellar peduncle. Scale bar, 500  $\mu\text{m}$ . **(c)** Location of optic fibers in dorsolateral pons. The optic fibers were placed near the ventrolateral boundary of the pontine gray. Scale bar, 1 mm.

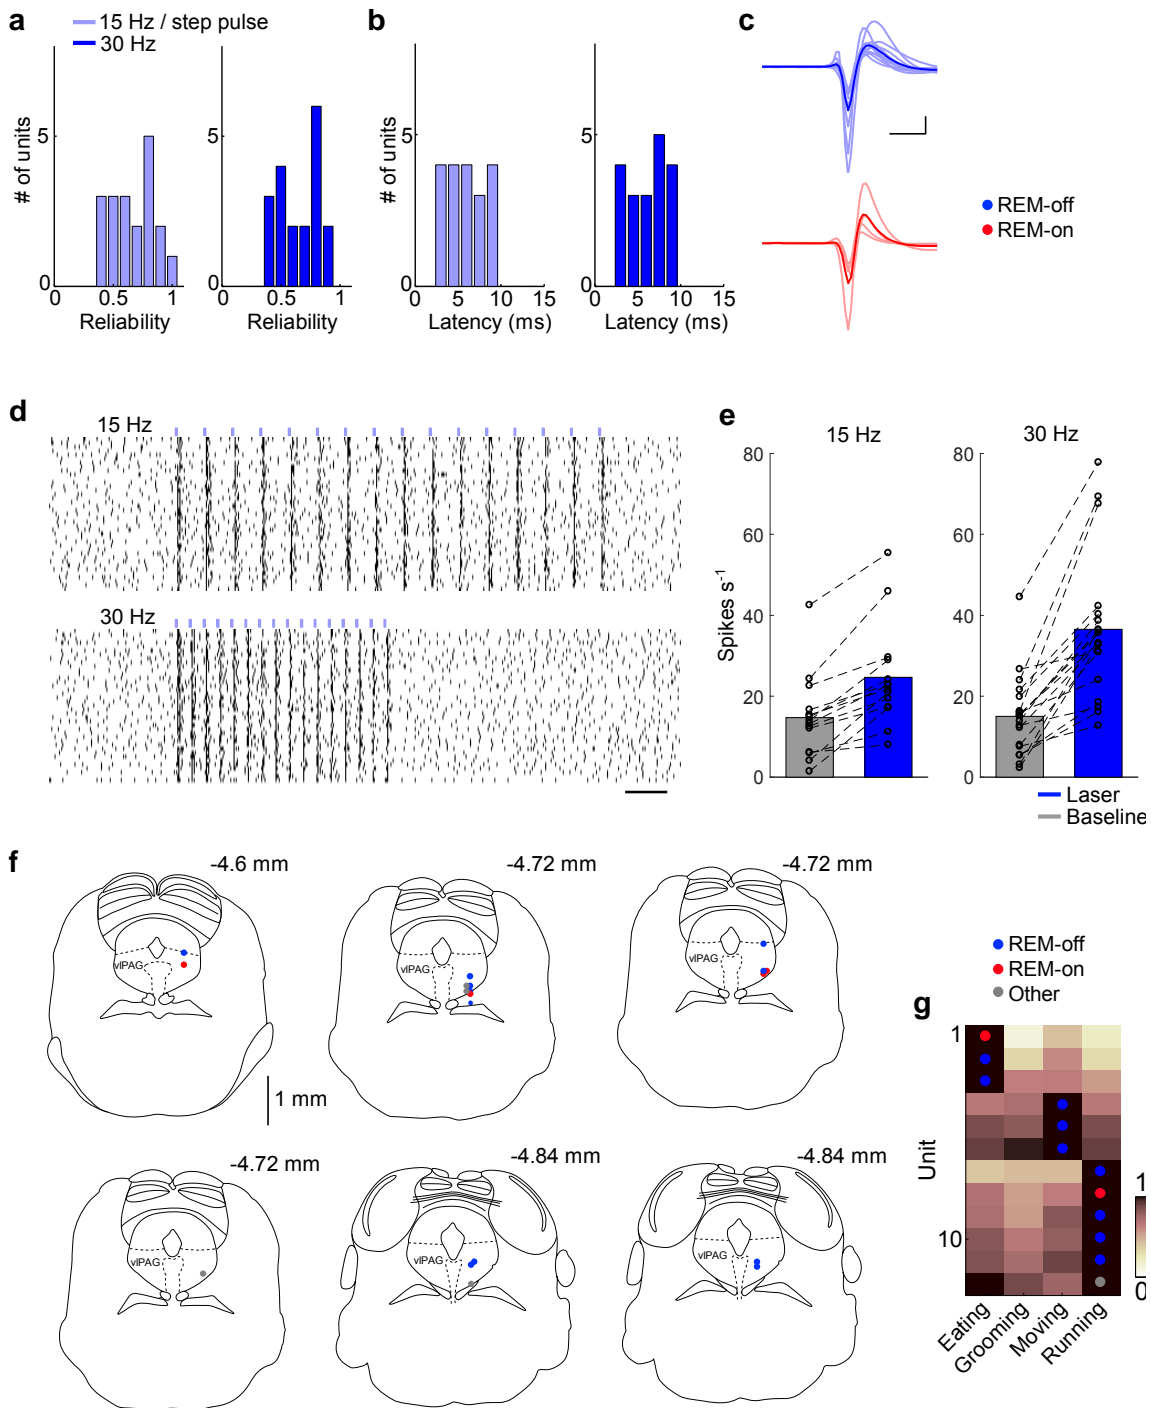

79  
80

81 **Supplementary Figure 5.** Optogenetic identification of vIPAG GABAergic neurons. (a)  
 82 Distribution of the reliability of laser-evoked spikes for the 19 identified GABAergic  
 83 neurons, with 15 Hz or step pulse stimulation (left, 5/19 neurons were tested with step  
 84 pulse and 14/19 with 15 Hz stimulation) or 30 Hz stimulation (right). The reliability was  
 85 defined as the fraction of laser pulses followed by a spike. (b) Right, distribution of the  
 86 latency of laser-evoked spikes for identified GABAergic neurons. Latency was defined as  
 87 the timing of the first spike after the onset of each laser pulse. (c) Top, individual  
 88 waveforms of GABAergic REM-off units (light blue) and average across units (dark

89 blue). Bottom, individual (light red) and average (dark red) waveforms of GABAergic  
90 REM-on units. Scale bars, 0.5 ms, 0.2 mV. **(d)** Raster plots for 15 and 30 Hz stimulation  
91 of an example unit with a relatively high baseline firing rate ( $24.7 \text{ spikes s}^{-1}$ ). Scale bar,  
92 100  $\mu\text{s}$ . **(e)** Firing rates during 15 or 30 Hz laser stimulation and baseline activity during  
93 the preceding interval (1 s for 15 Hz and 0.5 s for 30 Hz, matching the duration of laser  
94 stimulation in each case). Each line indicates the firing rates of a single unit. Units for  
95 which we presented a step pulse instead of 15 Hz stimulation are not shown on the left.  
96 Laser stimulation significantly increased the firing rates for both 15 Hz ( $n = 14$  units,  $p =$   
97  $0.0001$ ,  $z = -3.3$ , Wilcoxon sign-rank test) and 30 Hz ( $n = 19$  units,  $p = 0.0001$ ,  $z = -3.8$ ).  
98 Additionally, the firing rates of each single unit were significantly increased across  
99 stimulation trials for both conditions (15 Hz,  $p < 0.04$  and 30 Hz,  $p < 0.02$ ; Wilcoxon  
100 sign-rank test). **(f)** Positions of the 19 identified vIPAG GABAergic neurons from 6 mice.  
101 Each dot indicates one neuron. Blue, REM-off neurons; red, REM-on neurons; gray –  
102 other neurons. **(g)** Relative firing rates of vIPAG GABAergic neurons during different  
103 wakeful behaviors. Most vIPAG GABAergic neurons showed the highest wake activity  
104 during moving or running. Only neurons from recording sessions in which the animal  
105 was engaged in all four behaviors are shown ( $n = 12$ ).  
106

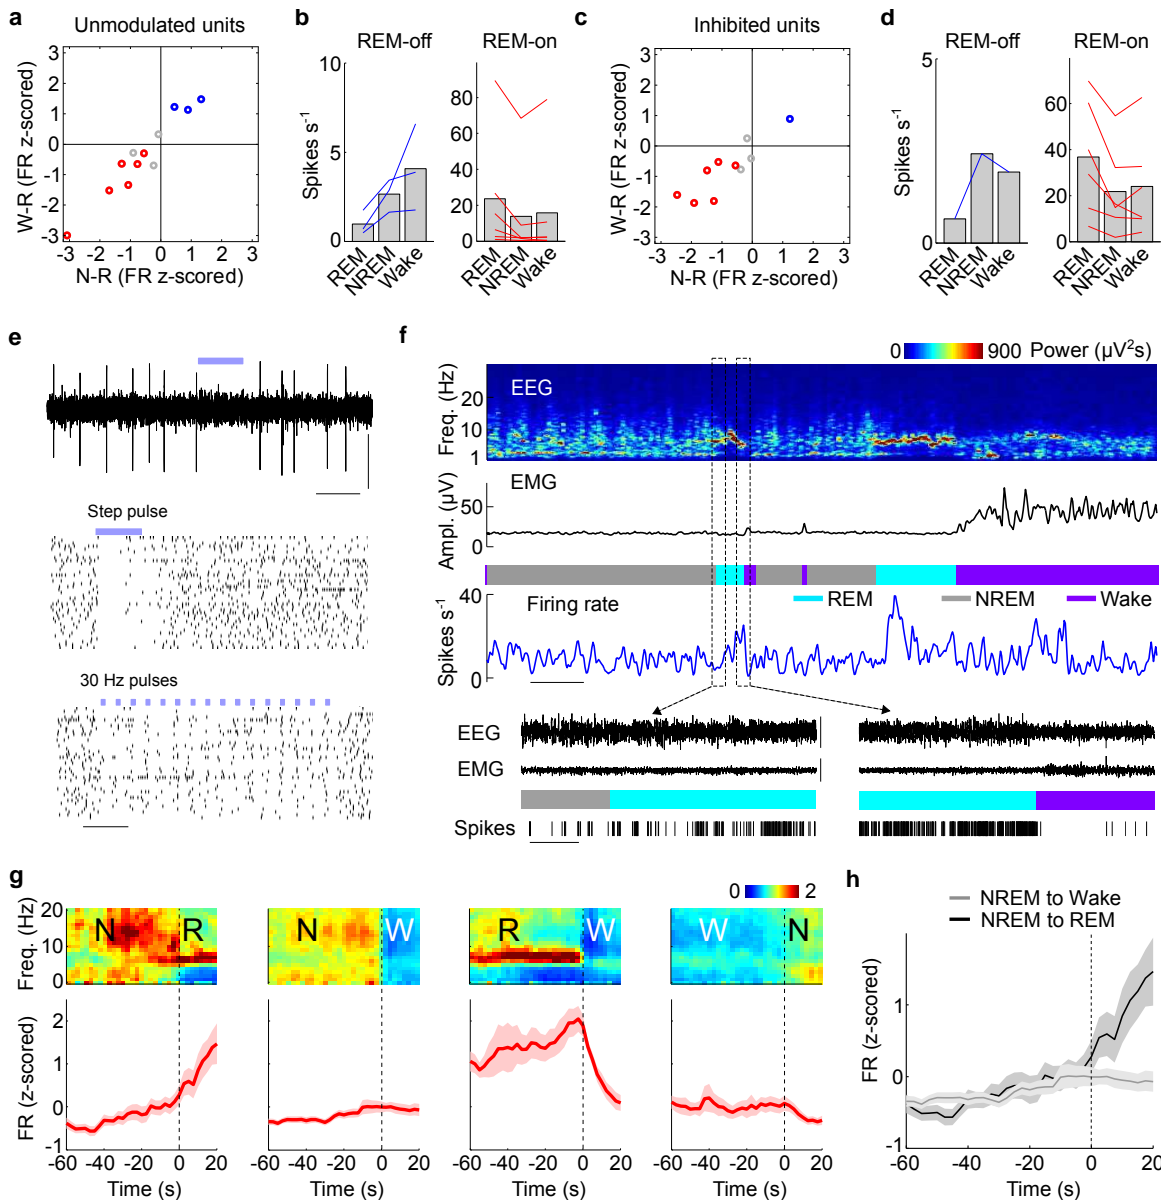

107

108 **Supplementary Figure 6.** Sleep-wake activity of unidentified vPAG neurons. (a) Firing  
 109 rates of laser-unmodulated units from 6 mice. Unmodulated units include all neurons that  
 110 were not significantly modulated by laser stimulation, as quantified by SALT (see  
 111 Methods). W, Wake; R, REM; N, NREM. Blue, significant REM-off neurons ( $P < 0.05$ ,  
 112 Wilcoxon rank-sum test, post-hoc Bonferroni correction); red, significant REM-on  
 113 neurons; gray, other neurons. (b) Firing rates of laser-unmodulated REM-off (left) and  
 114 REM-on (red) neurons during different brain states. Each line shows firing rates of one  
 115 unit; gray bar, average across units. (c) Firing rate of laser-inhibited units. Inhibited units  
 116 include neurons that were significantly modulated by laser stimulation, as quantified by  
 117 SALT, and whose firing rate was significantly decreased during the 30 Hz laser  
 118 stimulation period. (d) Firing rates of laser-inhibited REM-off (left) and REM-on (red)  
 119 neurons during different brain states ( $n = 12$ ). (e) Example of an inhibited vPAG unit.  
 120 Top, raw trace showing spikes before, during, and after laser stimulation. Blue bar, laser



121 step pulse (100 ms). Scale bars, 100 ms, 0.5 mV. Middle, spike raster showing multiple  
122 trials of laser stimulation with laser step pulse. Bottom, spike raster showing multiple  
123 trials of laser stimulation at 30 Hz. Scale bar, 100 ms. **(f)** Firing rate of an inhibited  
124 vIPAG neuron (blue) along with EEG spectrogram, EMG amplitude, and color-coded  
125 brain state (scale bar, 120 s). The timing of single spikes (vertical ticks) is depicted on an  
126 expanded time scale (indicated by black boxes) along with EEG, EMG raw traces (scale  
127 bars, 5 s, 0.5 mV). **(g)** Average EEG spectrogram (upper, normalized by the mean power  
128 in each frequency band) and mean firing rate ( $z$ -scored) of unidentified REM-on neurons  
129 (lower) at brain state transitions. The REM-on neurons include both laser-unmodulated  
130 **(a, b)** and laser-inhibited neurons **(c, d)**. Shading,  $\pm$ s.e.m. **(h)** The firing rates of REM-on  
131 neurons during NREM episodes preceding wake or REM episodes were not significantly  
132 different ( $n = 12$ ,  $P = 0.31$ ,  $T(11) = 1.06$ , paired  $t$ -test).

133

134

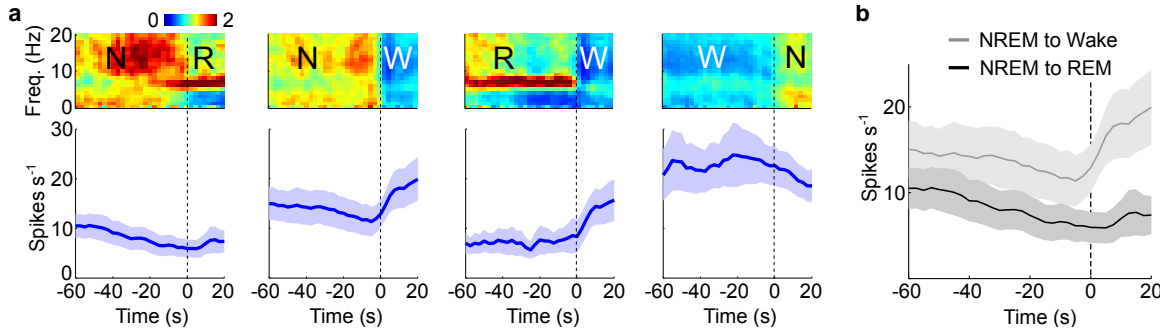

135

136 **Supplementary Figure 7.** Non-normalized firing rate of vIPAG GABAergic neurons  
 137 during brain state transitions. **(a)** Average EEG spectrogram (upper, normalized by the  
 138 mean power in each frequency band) and non-normalized mean firing rate of GABAergic  
 139 REM-off neurons (lower) at brain state transitions ( $n = 11$ ). Shading,  $\pm$ s.e.m. **(b)** The  
 140 firing rates during NREM episodes preceding wake were significantly higher than those  
 141 preceding REM episodes ( $P = 0.002$ , paired  $t$ -test).

142

143

144

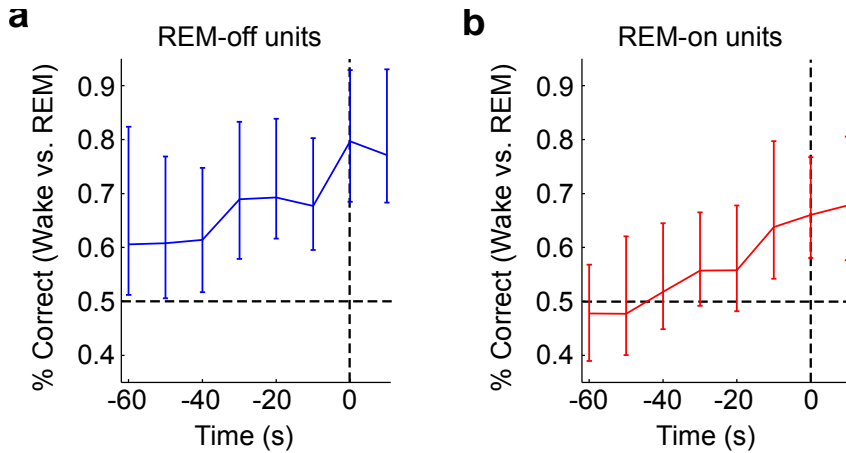

145  
 146  
 147  
 148  
 149  
 150  
 151  
 152  
 153  
 154  
 155  
 156  
 157  
 158  
 159  
 160

**Supplementary Figure 8.** Prediction of transition to REM or wake based on vIPAG NREM firing rates. **(a)** Linear discrimination analysis evaluating how well a NREM→REM or NREM→Wake transition can be predicted from the preceding NREM activity of single GABAergic REM-off neurons ( $n = 11$ ). The prediction accuracy was above the chance level (horizontal dashed line) even 60 s before the transition ( $P = 0.04$ , bootstrap). Error bars, 95% CI. **(b)** Prediction of NREM→REM or NREM→Wake transitions based on the preceding NREM activity of single REM-on neurons including both laser-unmodulated and laser-inhibited neurons ( $n = 12$ , red units in Supplementary Fig. 6a-d). In contrast to REM-off neurons, the prediction accuracy was above the chance level only 10 s before the transition.

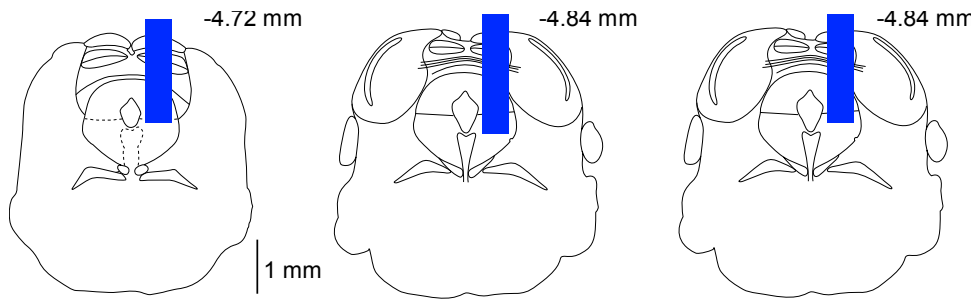

161  
162  
163  
164  
165  
166  
167  
168  
169  
170

**Supplementary Figure 9.** Position of GRIN lenses within the vIPAG of *GAD2-Cre* mice used for imaging vIPAG GABAergic neurons. Each diagram depicts the section where the lesion caused by the GRIN lens was largest along the rostrocaudal axis. Blue bar, GRIN lens; scale bar, 1 mm.

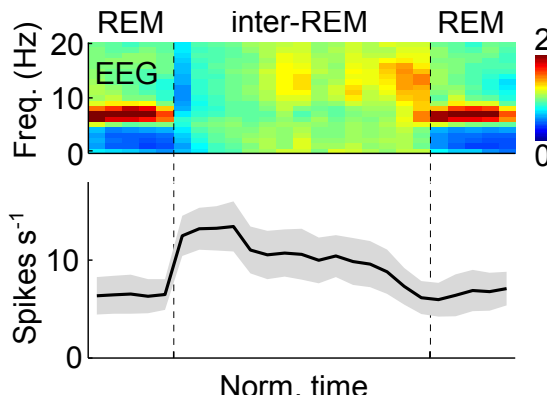

171  
 172  
 173  
 174  
 175  
 176  
 177  
 178  
 179  
 180  
 181  
 182  
 183

**Supplementary Figure 10.** Non-normalized firing rate of vIPAG GABAergic neurons during inter-REM periods. Shown are average normalized EEG spectrogram (upper) and non-normalized mean firing rate of significant REM-off vIPAG GABAergic neurons (lower) during two successive REM episodes and the inter-REM interval. To average across multiple inter-REM periods REM and inter-REM durations were time-normalized.

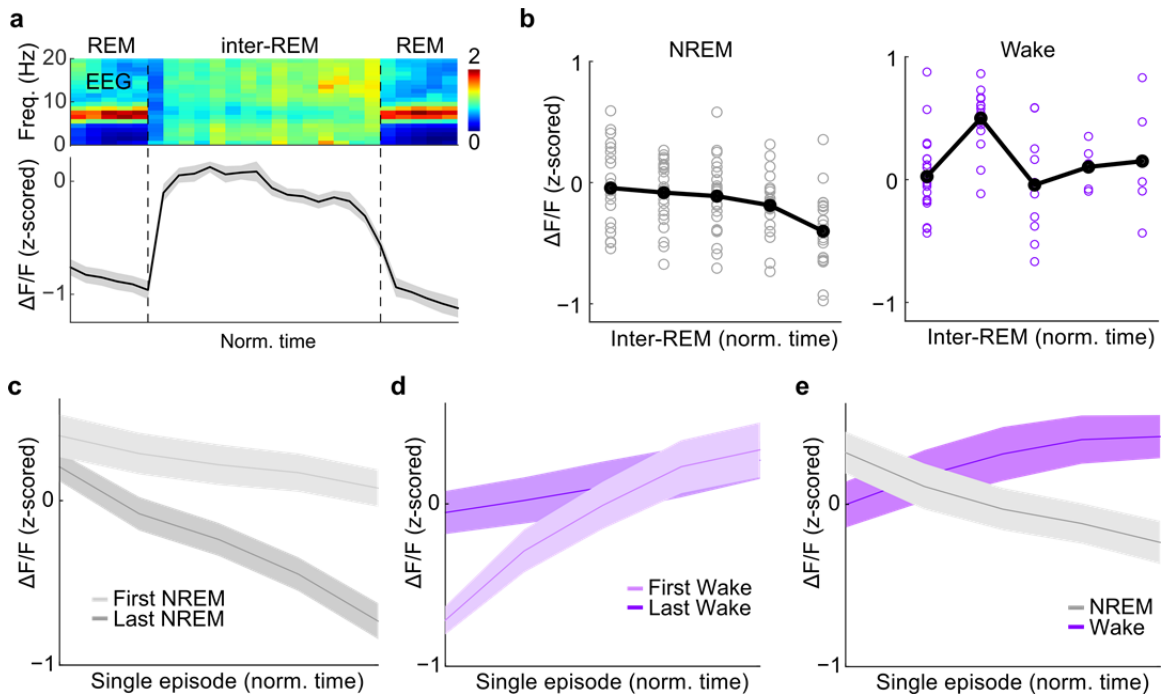

184  
185

**Supplementary Figure 11.** Slow modulation of vIPAG GABAergic neuron activity measured with calcium imaging. **(a)** Average normalized EEG spectrogram (upper) and mean calcium activity ( $\Delta F/F$ , z-scored) of significant REM-off ROIs (lower) during two successive REM episodes and the inter-REM interval. Each REM episode and inter-REM interval was temporally compressed to unit length before the calcium traces were averaged over multiple episodes/intervals and across ROIs ( $n = 23$ ). Shading,  $\pm$ s.e.m. **(b)** Calcium activity ( $\Delta F/F$ , z-scored) during NREM (left) and wake (right) episodes within different segments of the inter-REM interval. Each inter-REM interval was divided into 5 equally sized bins, and NREM or wake activities were averaged for each bin. Each symbol represents the average NREM or wake activity of an ROI. The average NREM activity decreased during the inter-REM period ( $R = -0.36$ ,  $P = 7.3 \times 10^{-5}$ ,  $T(21) = -1.77$ , linear regression), while the wake activity showed no significant trend ( $R = 0.04$ ,  $P = 0.76$ ,  $T(23) = -0.18$ ). Black line, average calcium activity of each bin. **(c)** Mean calcium activity during the first (light gray) and last (dark gray) NREM episodes of each inter-REM interval. Each NREM episode was temporally compressed to unit duration before the z-scored calcium activity was averaged over episodes and across ROIs. The activity during the first NREM period was significantly higher than during the last period ( $n = 23$  ROIs,  $P = 0.00015$ ,  $T(22) = 4.41$ , paired  $t$ -test). Shading,  $\pm$ s.e.m. **(d)** Mean calcium activity during the first (light purple) and last (dark purple) wake episodes of each inter-REM interval. Each wake episode was temporally compressed to unit duration before averaging ( $P = 0.25$ ,  $T(22) = -1.17$ ). **(e)** Mean calcium activity during all NREM (gray) and wake (purple) episodes. Note that the calcium activity decreased during NREM ( $R = -0.36$ ,  $P = 2.9 \times 10^{-24}$ ,  $T(21) = -1.77$ ) but increased during wake episodes ( $R = 0.27$ ,  $P = 1.7 \times 10^{-13}$ ,  $T(21) = 1.29$ ).

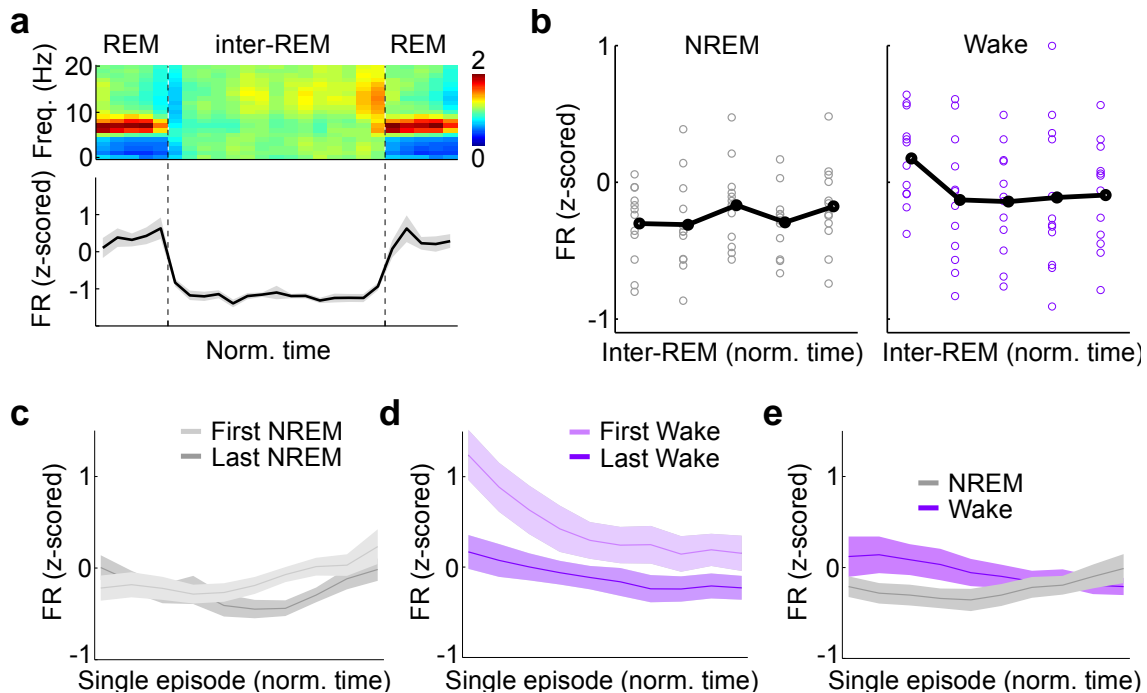

210  
211  
212  
213  
214  
215  
216  
217  
218  
219  
220  
221  
222  
223  
224  
225  
226  
227  
228  
229  
230  
231  
232  
233  
234  
235  
236  
237  
238

**Supplementary Figure 12.** Firing rates of vIPAG REM-on neurons during inter-REM interval. **(a)** Average normalized EEG spectrogram (upper) and mean firing rate (z-scored) of significant REM-on vIPAG neurons (lower) during two successive REM episodes and the inter-REM interval. The REM-on neurons include both laser-unmodulated and laser-inhibited neurons ( $n = 12$ , red units in Supplementary Fig. 6a-d). Each REM episode and inter-REM interval was temporally compressed to unit length before the firing rates were averaged over multiple episodes/intervals and across REM-on neurons. Shading,  $\pm$ s.e.m. **(b)** Firing rate (FR, z-scored) during NREM (left) and wake (right) episodes within different segments of the inter-REM interval. Each inter-REM interval was divided into 5 equally sized bins, and NREM or wake firing rates were averaged for each bin. Each symbol represents the average NREM or wake firing rate of a unit. Neither the NREM nor wake activity showed a consistent change across the inter-REM period (NREM,  $R = 0.13$ ,  $P = 0.33$ ,  $T(58) = 0.10$ ; Wake,  $R = -0.17$ ,  $P = 0.19$ ,  $T(58) = -1.32$ ; linear regression). Black line, average firing rate of each bin. **(c)** Mean firing rates of vIPAG REM-on neurons during the first (light gray) and last (dark gray) NREM episodes of each inter-REM interval. Each NREM episode was temporally compressed to unit duration before the z-scored firing rate was averaged over episodes and across cells. The firing rates during the last and first NREM episode were not significantly different ( $P = 0.19$ ,  $T(11) = -1.39$ , paired  $t$ -test). Shading,  $\pm$ s.e.m. **(d)** Mean firing rates of REM-on units during the first (light purple) and last (dark purple) wake episodes of each inter-REM interval. Each wake episode was temporally compressed to unit duration before averaging. The firing rate during the first wake period was significantly higher than during the last one ( $P = 0.04$ ,  $T(11) = 2.36$ , paired  $t$ -test). **(e)** Mean firing rates of REM-on units during all NREM (gray) and wake (purple) episodes. The firing rate showed no systematic change during each NREM episode ( $R = 0.18$ ,  $P = 0.063$ ,  $T(108) = 1.88$ , linear regression) and a slight decrease during the wake episode ( $R = -0.24$ ,  $P = 0.01$ ,  $T(108) = -2.61$ , linear regression).

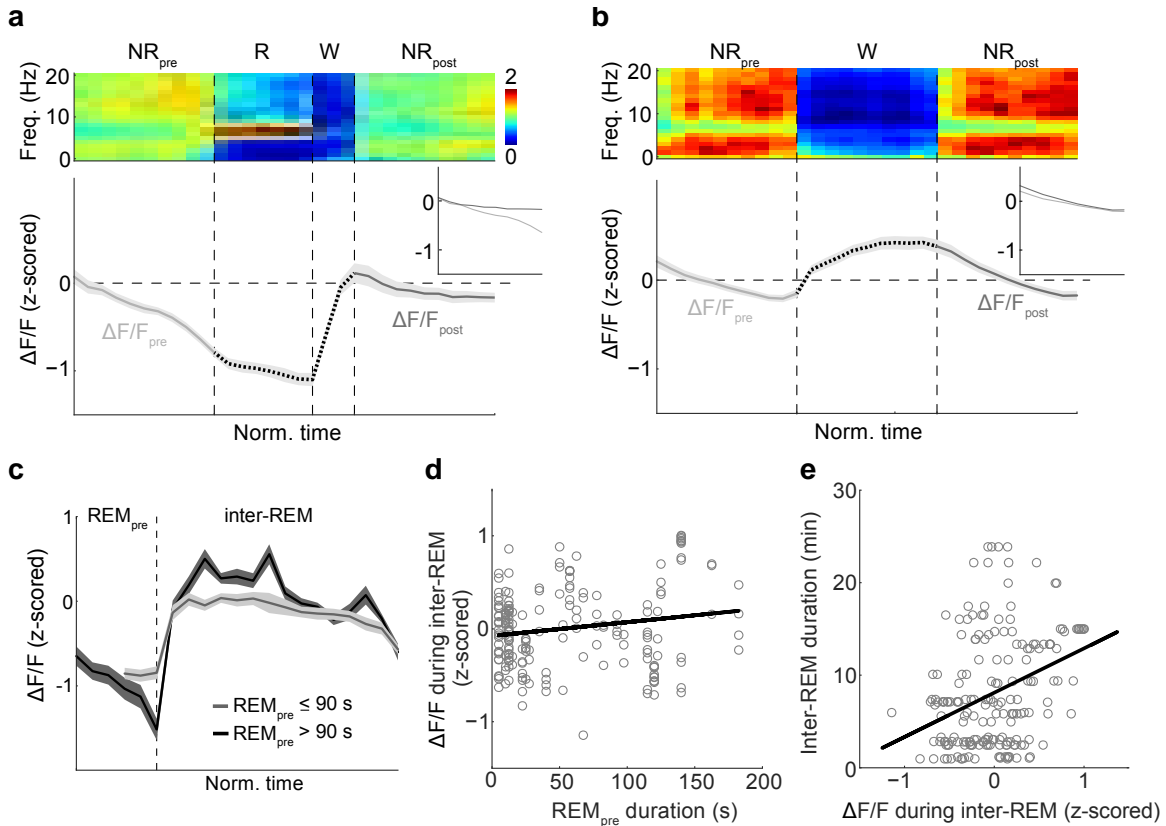

239  
 240  
 241  
 242  
 243  
 244  
 245  
 246  
 247  
 248  
 249  
 250  
 251  
 252  
 253  
 254  
 255  
 256  
 257  
 258  
 259  
 260  
 261  
 262  
 263

**Supplementary Figure 13.** Homeostatic modulation of vIPAG GABAergic neuron activity measured with calcium imaging. **(a)** Average normalized EEG spectrogram (upper) and mean calcium activity ( $\Delta F/F$ , z-scored) of significant REM-off ROIs (lower,  $n = 23$ ) during the NREM→REM→Wake→NREM transition sequence. Each REM, NREM, or wake episode was temporally compressed to unit length before the calcium activity was averaged over multiple sequences and across ROIs. Shading,  $\pm$ s.e.m. Inset, the calcium activity during the NREM episodes preceding REM ( $NR_{pre}$ ) was significantly higher than during NREM episodes following REM ( $NR_{post}$ ;  $P = 0.025$ ,  $T(22) = -2.39$ , paired  $t$ -test). **(b)** Similar to **(a)**, but for the NREM→Wake→NREM transition sequence. Note that without the intervening REM episode, the calcium activities were not significantly different during  $NR_{pre}$  and  $NR_{post}$  ( $P = 0.085$ ,  $T(22) = -1.81$ ). **(c)** The calcium activity of REM-off ROIs during the inter-REM interval following a long (> 90 s) REM episode was higher than that following a short ( $\leq 90$  s) REM episode ( $P = 0.028$ ,  $T(22) = -2.38$ , paired  $t$ -test). **(d)** Correlation between REM episode duration and calcium activity during the subsequent inter-REM interval. Each dot represents the activity of an ROI during a single inter-REM interval ( $n = 189$ ). Line, linear fit ( $R = 0.18$ ,  $P = 0.016$ ,  $T(187) = 2.50$ , linear regression). **(e)** Correlation between calcium activity during inter-REM interval and duration of the interval. Each dot represents the activity of an ROI during a single inter-REM interval ( $n = 189$ ). Line, linear fit ( $R = 0.35$ ,  $P = 1.2 \times 10^{-6}$ ,  $T(187) = 5.11$ ).



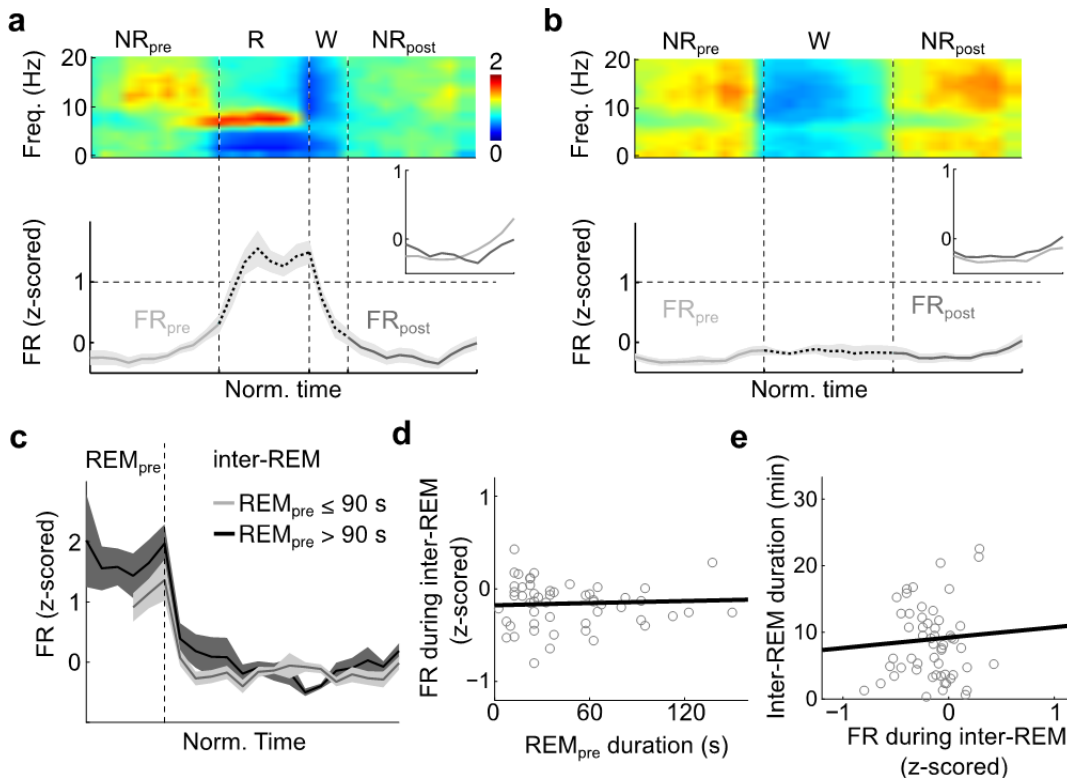

264  
 265  
 266  
 267  
 268  
 269  
 270  
 271  
 272  
 273  
 274  
 275  
 276  
 277  
 278  
 279  
 280  
 281  
 282  
 283  
 284  
 285  
 286  
 287  
 288  
 289  
 290

**Supplementary Figure 14.** Firing rates of REM-on neurons are not modulated by homeostatic REM sleep pressure. **(a)** Average normalized EEG spectrogram (upper) and mean firing rate (z-scored) of significant REM-on neurons (lower) during the NREM→REM→Wake→NREM transition sequence. REM-on neurons include both laser-unmodulated and laser-inhibited units ( $n = 12$ ). Each REM, NREM, or wake episode was temporally compressed to unit length before the firing rates were averaged over multiple sequences and across neurons. Shading,  $\pm$ s.e.m. Inset, the firing rates during the NREM periods preceding ( $NR_{pre}$ ) and following REM ( $NR_{post}$ ) were not significantly different ( $P = 0.51$ ,  $T(11) = 0.68$ , paired  $t$ -test). **(b)** Similar to **(a)**, but for the NREM→Wake→NREM transition sequence. The mean firing rates of the REM-on neurons during  $NR_{pre}$  and  $NR_{post}$  were similar ( $P = 0.06$ ,  $T(11) = -2.11$ , paired  $t$ -test). **(c)** The firing rate of REM-on neurons during the inter-REM interval following a short ( $\leq 90$  s) REM episode were similar to that following a long ( $> 90$  s) REM episode ( $P = 0.18$ ,  $T(6) = -1.51$ , paired  $t$ -test). **(d)** The firing rates of REM-on neurons during the subsequent inter-REM interval showed no significant correlation with REM episode duration. Each dot represents the activity of a unit during a single inter-REM interval ( $n = 56$ ). Line, linear fit ( $R = 0.07$ ,  $P = 0.60$ ,  $T(54) = 0.52$ , linear regression). **(e)** The duration of an inter-REM interval was not significantly correlated with the firing rate of REM-on neurons during the interval. Each dot represents the activity of a unit during a single inter-REM interval ( $n = 56$ ). Line, linear fit ( $R = 0.05$ ,  $P = 0.70$ ,  $T(54) = 0.39$ ).

291 **References**

292

293 1 Weber, F. *et al.* Control of REM sleep by ventral medulla GABAergic neurons.  
294 *Nature* **526**, 435-438 (2015).
